# Supplementary material for: Strontium isotope and element constraints on the paleoenvironment of the latest Ediacaran in the Sichuan Basin, southeastern Tibetan Plateau
Source: Frontiers journal article supplement (doi:10.3389/feart.2022.865709), 2022-09-08
Supplement: Table_1.XLSX [file Table_1.XLSX]

## Sheet: Sr isotope
Depth	87Sr/86Sr
m
5711	0.708926
5721	0.708881
5732	0.709181
5742	0.70892
5796	0.709526
5806	0.709539
5816	0.709468
5826	0.709277
5836	0.709419
5846	0.709457
5856	0.709504
5866	0.709526
5876	0.709308
5886	0.709037
5896	0.709366
5906	0.70904
5916	0.709425
5946	0.70939
5956	0.709082
5966	0.708927
5976	0.709045
5986	0.708982
5996	0.709008
6006	0.7091
6026	0.709008
6036	0.709102
6046	0.709154
6056	0.709122
6066	0.709186
6076	0.709208
6086	0.709121
6096	0.709228
6106	0.709213
6116	0.709153
6126	0.709207
6136	0.709044
6146	0.709092
6156	0.709173
6166	0.709058
6176	0.709108
6186	0.709221
6195	0.70936
6204	0.709404
6214	0.709203
6224	0.709245
6234	0.709227

## Sheet: Elements
Depth(	Al2O3	Ti	V	Cr	Mn	Co	Ni	Rb	Sr	Th	U
m	%	ppm	ppm	ppm	ppm	ppm	ppm	ppm	ppm	ppm	ppm
5726	0.32	223.1	11.03	78.37	235.93	3.66	7.82	3.91	150.22	0.02	0.01
5732	0.45	360.27	18.88	303.55	445.41	13.69	7.7	6.49	139.26	0.9	0.01
5750	2.1	1372.46	15.55	238.12	478.02	18.16	16.55	31.94	197.14	0.01	0.11
5756	0.22	151.39	7.58	51.94	212.26	3.68	3.46	2.15	78.22	0.01	0.3
5762	0.87	503.07	18.34	174.58	386.11	8.59	8.66	7.8	171.27	0.01	0.01
5768	0.42	179.51	10.24	42.02	335.12	3.17	2.56	3.79	81.59	0.01	0.31
5774	0.68	358.22	14.66	94.45	352.22	8	6.52	9.24	175.29	0.47	0.01
5780	1.35	443.28	16.78	97.37	376.82	4.49	3.75	7.33	144.56	0.01	0.01
5792	0.3	167.62	10.84	97.06	406.17	4.3	0.52	3.11	99.56	0.94	0.27
5798	0.6	209.96	11.38	94.71	400.71	4.18	1.24	2.84	96.43	0.59	0.17
5802	0.51	196.71	11.27	89.51	368.85	3.54	1.11	3.08	106.32	0.01	0.08
5808	0.51	199.11	9.76	86.66	354.6	2.42	1.8	3.02	117.37	0.14	0.01
5814	0.59	167.74	9.32	54.31	337.55	1.27	0.01	1.74	78.07	0.46	0.4
5822	0.35	142.48	8.47	57.8	303.76	2.19	1.08	1.81	84.5	0.01	0.44
5828	0.14	77.81	6.53	42.9	271.51	0.23	0.03	0.18	77.54	0.03	0.3
5834	0.19	99.63	6.43	48.96	317.8	0.48	0.02	1.62	105.43	0.63	0.27
5838	0.12	90.43	7.06	44.21	401.34	1.4	0.02	0.78	83.58	0.8	0.59
5842	0.2	141.45	9.33	54.46	435.73	2.68	0.01	0.49	84.99	0.53	0.46
5846	0.11	87.12	7.38	43	419.2	0.82	0.02	0.09	90.7	0.68	0.32
5854	0.08	82.27	6.2	39.58	329.65	1.22	0.01	0.12	77.46	0.07	0.17
5858	0.09	73.46	3.93	40.89	323.43	0.74	0.01	0.01	81.2	0.51	0.14
5866	0.08	64.49	4.34	45.7	337.83	0.01	0.01	0.01	81.63	0.41	0.24
5872	0.25	174.48	7.35	108.57	328.15	1.89	4.72	4.03	211.54	0.01	0.01
5876	0.51	341.35	21.59	290.76	303.87	3.47	17.07	11.33	564.14	2.16	0.01
5882	0.52	301.35	16.9	245.41	378.01	4.88	23.02	10.56	474.08	0.93	0.01
5886	0.46	292.89	21.99	273.77	358.64	4.3	18.13	8.8	491.56	1.07	0.01
5896	0.43	287.03	12.76	141.68	303.14	3.65	16.3	6.87	357.7	0.78	0.01
5902	0.4	294.09	27.27	278.09	241.9	4.14	18.99	10.83	515.31	2.61	0.01
5906	0.39	293.76	13.86	206.75	312.92	4.39	14.29	10.1	441.93	1.55	0.02
5912	0.19	131.22	4.69	53.51	349.45	1	1.01	1.67	125	0.35	0.02
5916	0.21	144.97	5.85	66.97	353.17	3.7	2.94	3.67	144.49	0.01	0.01
5922	0.15	110.62	5.16	55.62	361.37	0.01	0.01	1.44	136.94	0.11	0.01
5926	0.11	78.69	2.94	30.27	321.45	0.01	0.01	0.01	78.56	0.1	0.21
5932	0.19	120.86	4.52	75.98	255.17	3.37	3.5	2.61	123.66	0.18	0.06
5936	0.16	109.82	4.97	54.48	227.84	1.85	3.9	1.92	127.32	0.22	0.01
5942	0.18	116.2	3.97	53.68	261.62	5.33	2.42	1.51	94.41	0.01	0.18
5946	0.17	118.73	3.42	28.67	327.77	1.44	0.99	1.25	83.95	0.01	0.32
5952	0.11	89.97	4.06	36.44	219.05	0.38	5.82	0.32	98.04	0.24	0.09
5956	0.1	85.25	3.75	32.24	184	0.36	2.41	0.01	88.53	0.02	0.32
5962	0.13	95.2	3.97	23.05	142.68	1.15	1.71	0.39	66.29	0.25	0.55
5976	0.12	85.89	4.43	19.65	135.07	0.18	1.07	0.01	58.63	0.01	0.43
5982	0.12	79.38	3.51	20.53	137.57	0.21	1.35	0.29	62.32	0.15	0.57
5986	0.14	100.67	3.85	31.68	126.46	0.93	2.25	0.8	83.44	0.01	0.26
5992	0.11	75.87	3.85	26.55	138.49	0.24	1.75	1.58	75.44	0.48	0.56
5996	0.12	91.25	5.37	27.58	129.25	2.5	1.98	0.94	78.59	0.27	0.28
6002	0.11	77.44	4.36	16.69	120.23	0.01	0.34	0.03	67.44	0.09	0.47
6006	0.15	110.82	4.87	25.81	123.17	0.45	0.57	0.64	71.76	0.32	0.27
6012	0.16	133.18	4.56	31.9	152.55	0.84	1.29	0.51	84.44	0.17	0.2
6016	0.14	113.96	3.06	33.81	140.87	0.15	0.78	0.36	78.8	0.2	0.27
6022	0.13	86.47	4.07	26.82	147.31	0.01	1.84	0.02	74.02	0.32	0.2
6026	0.14	87.75	4.47	26.48	128.33	0.34	1.04	0.98	74.66	0.34	0.31
6032	0.12	92.06	4.93	33.93	137.47	0.04	0.65	0.09	76.65	0.18	0.32
6036	0.1	75	4.3	20.74	136.21	0.01	0.01	0.01	66.77	0.05	0.27
6042	0.11	88.39	5	41.97	140.56	0.07	0.49	0.04	79.18	0.46	0.21
6046	0.12	110.53	4.97	37.33	134.71	0.44	0.94	0.15	83.94	0.36	0.16
6052	0.1	86.7	4.69	28.83	124.2	0.07	1.07	0.02	78.93	0.26	0.07
6056	0.08	74.06	5.38	20.19	128.42	0.03	0.72	0.34	63.68	0.49	0.43
6066	0.14	98.06	5.18	22.77	137.23	0.01	0.43	0.01	68.17	0.27	0.15
6072	0.35	205.3	6.51	15.31	141.26	0.46	0.4	3.01	63.52	0.53	0.32
6076	0.18	124.33	5.06	19.98	137.77	0.01	0.71	0.12	64.95	0.28	0.16
6082	0.08	69.7	4.69	16.58	129.03	0.01	0.31	0.01	54.72	0.25	0.36
6086	0.14	119.73	6.26	34.57	146.42	1.01	1.73	0.75	77.44	0.27	0.13
6092	0.1	94.57	5.56	18.37	129.65	0.01	0.54	0.01	55.06	0.36	0.53
6096	0.11	107.67	4.93	28.89	129.14	0.47	1.08	0.01	71.34	0.48	0.26
6102	0.12	110.76	5.75	30.2	131.13	0.01	0.31	0.01	64.12	0.15	0.69
6106	0.11	91.89	5.2	18.8	134.23	0.04	0.59	0.01	58.15	0.23	0.55
6112	0.11	95.32	4.94	28.19	121.43	0.43	1.7	0.02	71.38	0.36	0.58
6116	0.12	88.28	4.36	21.34	136.87	0.01	0.01	0.01	67.72	0.31	0.65
6122	0.14	106.76	4.06	19.69	140.64	2.38	1.11	0.45	72.54	0.22	0.52
6126	0.11	84.04	3.14	17.88	119.23	1.48	0.93	0.01	68.61	0.1	0.26
6132	0.09	73.66	3.62	15.47	116.22	1.32	0.69	0.01	64.03	0.13	0.32
6136	0.06	59.77	4.02	26.46	118.88	1.15	0.7	0.02	53	0.34	0.59
6142	0.09	74.07	3.56	23.4	104.21	1.18	0.92	0.02	67.6	0.01	0.27
6146	0.08	68.47	4	16.48	104.83	1.22	0.63	0.01	59.7	0.51	0.16
6152	0.14	118.76	4.98	28.56	122.95	1.69	2.11	0.01	79.63	0.31	0.07
6156	0.13	124.52	4.89	24.91	123.06	1.26	1.85	0.12	76.12	0.14	0.19
6162	0.12	102.15	5.04	31.39	139.77	1.85	2.73	1.07	86.4	0.63	0.1
6166	0.08	74.53	4.11	16.51	116.85	0.43	0.51	0.01	63.14	0.34	0.23
6172	0.09	99.84	4.81	12.82	110.49	0.95	0.92	0.01	54.08	0.31	0.35
6176	0.13	114.03	5.18	25.65	139.21	1.23	2.3	0.38	88	0.75	0.09
6182	0.14	118.87	5.06	20.84	134.47	0.64	1.62	0.01	63.41	0.4	0.24
6186	0.09	62.54	3.47	17.57	149	0.02	0.01	0.01	61.66	0.06	0.33
6192	0.1	61.67	3.49	20.28	155.35	0.01	0.01	0.02	66.25	0.33	0.34
6196	0.07	56.31	3.83	17.92	146.5	0.5	0.28	0.01	64.52	0.1	0.36
6202	0.08	61.04	4.11	15.44	126.32	1.64	0.16	0.01	66.71	0.01	0.63
6206	0.05	37.11	2.9	10.48	106.33	1.11	0.29	0.01	51.82	0.2	0.39
6212	0.28	115.24	4.54	22.82	269.46	0.78	0.01	1.12	67.71	0.13	0.44
6216	0.13	75.97	4.09	21.79	182.39	1.56	1.39	0.01	64.81	0.07	0.28
6222	0.13	59.13	4.55	21.85	203.65	0.27	0.01	0.01	54.89	0.01	0.45
6226	0.22	120.49	6.88	19.3	341.79	1.58	0.94	2.39	86.27	0.17	0.28
6232	0.09	47.31	3.83	27	181.43	0.78	1.7	0.01	54.04	0.27	0.4
6236	0.08	50.54	3.8	19.81	148.87	0.7	0.78	0.01	61.98	0.1	0.24
6242	0.15	82.13	7.6	23.32	249.88	1.65	2.24	0.3	73.11	0.48	0.12
6246	0.18	96.68	6.93	18.49	205.7	1.17	3.35	0.11	67	0.24	0.16
6252	0.15	64.92	5.49	27.19	194.28	0.4	2.64	0.01	50.14	0.13	0.01
6256	0.09	47.66	5.53	21.63	171.74	1.24	1.54	0.01	48.62	0.22	0.01
6262	0.09	45.99	4.85	15.92	170.07	0.01	1.59	0.13	48.48	0.01	0.01
6266	0.09	43.77	4.79	19.82	192.01	0.1	0.68	0.02	52.55	0.14	0.19
6272	0.08	42.3	4.54	20.46	194.59	0.01	2.86	0.02	58.45	0.29	0.01
6276	0.05	34.57	4.72	21.82	231.46	0.07	0.04	0.01	58.87	0.35	0.23
